# Supplementary material for: Artificially stimulating retrotransposon activity increases mortality and accelerates a subset of aging phenotypes in Drosophila
Source: eLife journal article supplement (doi:10.7554/elife.80169), 2022-08-18

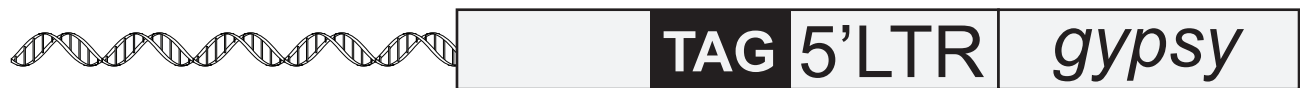

**←biotin**

Extend Biotinylated TAG primer

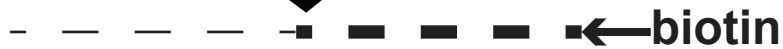

Purify biotinylated ssDNA and  
Ligate Read 2 primer

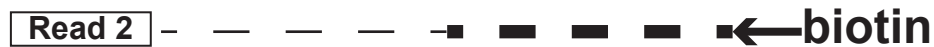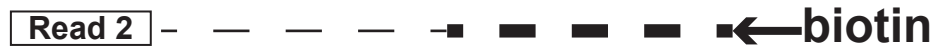

PCR with LTR nested primer  
and Read 2 primer

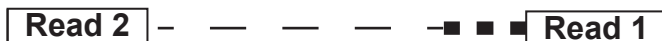

Add attachment sequences  
for Illumina sequencing

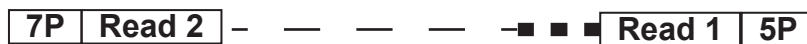

Supplement: supp [file elife_poa_e80169_Figure_3_figure_supplement_1.pdf › elife_poa_e80169_Figure_3_figure_supplement_1.pdf]
