# Supplementary figures and images for: Artificially stimulating retrotransposon activity increases mortality and accelerates a subset of aging phenotypes in Drosophila
Source: eLife journal article supplement (doi:10.7554/elife.80169), 2022-08-18

Wildtype ( $w^{DAH}$ )

TE that go up ( $p < 0.05$ )

**1731**

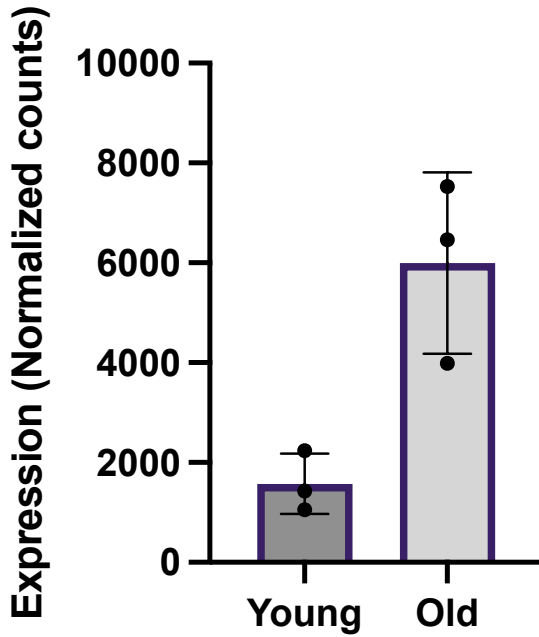

**DOC4**

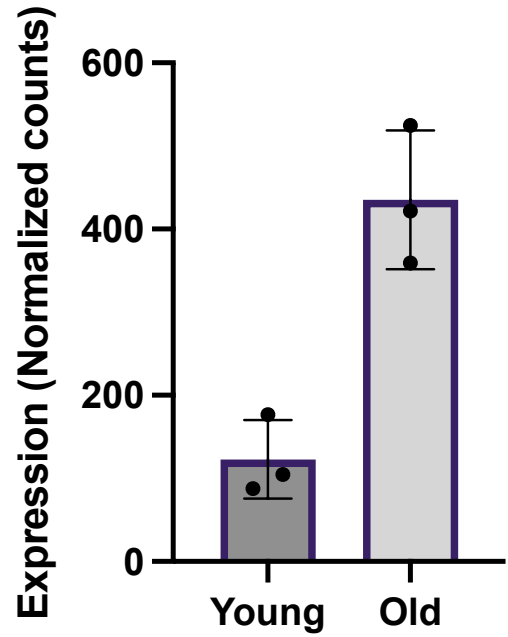

TE that go down ( $p < 0.05$ )

**G6**

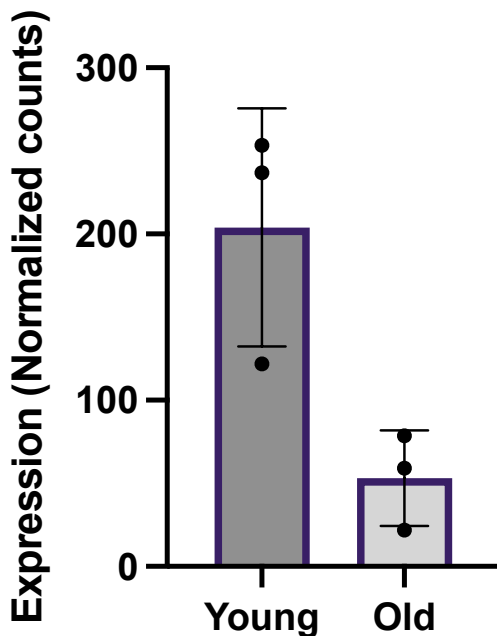

**STALKER2**

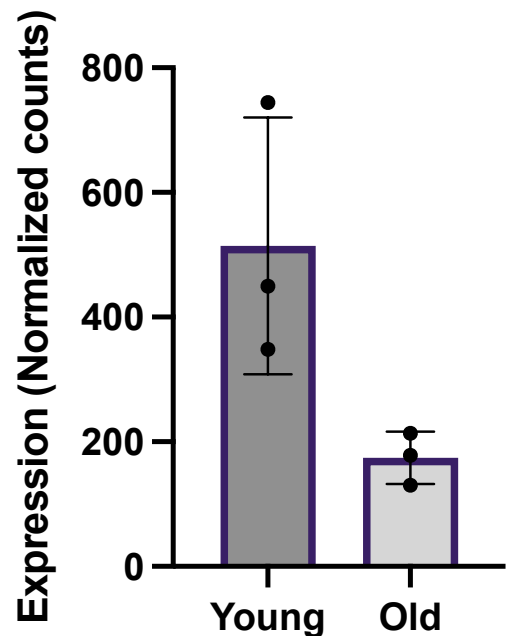

Supplement: supp [file elife_poa_e80169_Figure_1_figure_supplement_1.pdf › elife_poa_e80169_Figure_1_figure_supplement_1.pdf]

# FOXO deletion ( $\Delta 94$ )

TE that go up ( $p < 0.05$ )

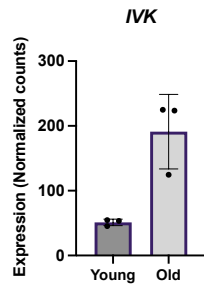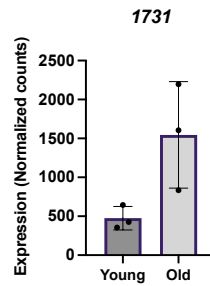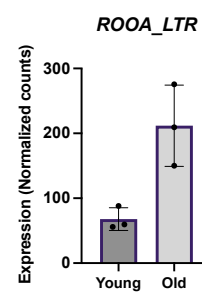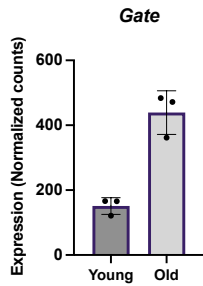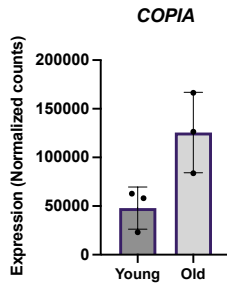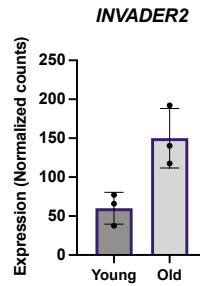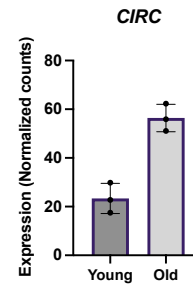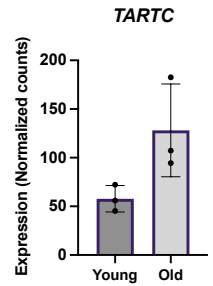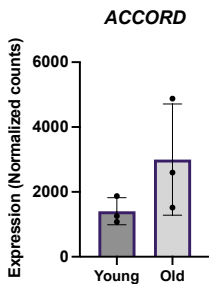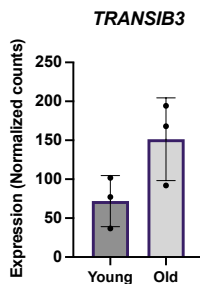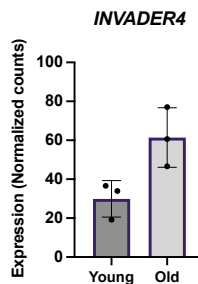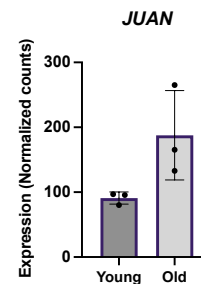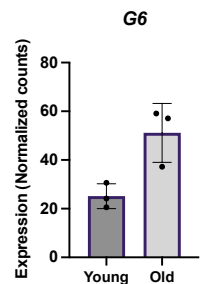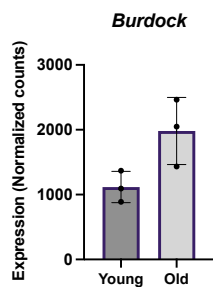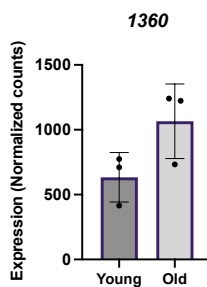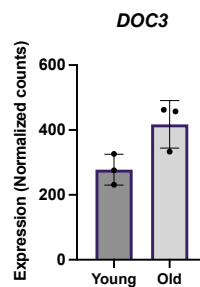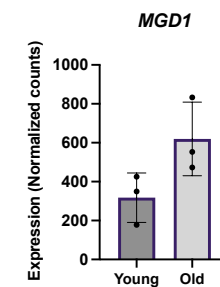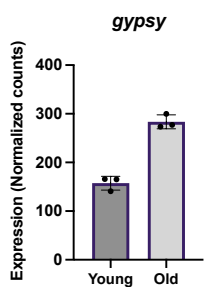

Supplement: supp [file elife_poa_e80169_Figure_1_figure_supplement_2.pdf › elife_poa_e80169_Figure_1_figure_supplement_2.pdf]

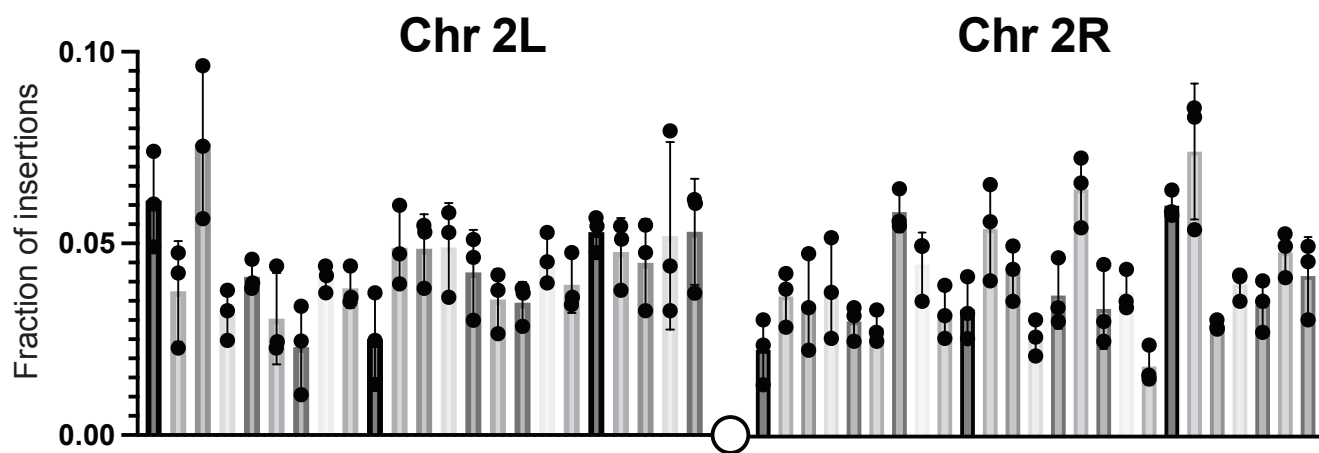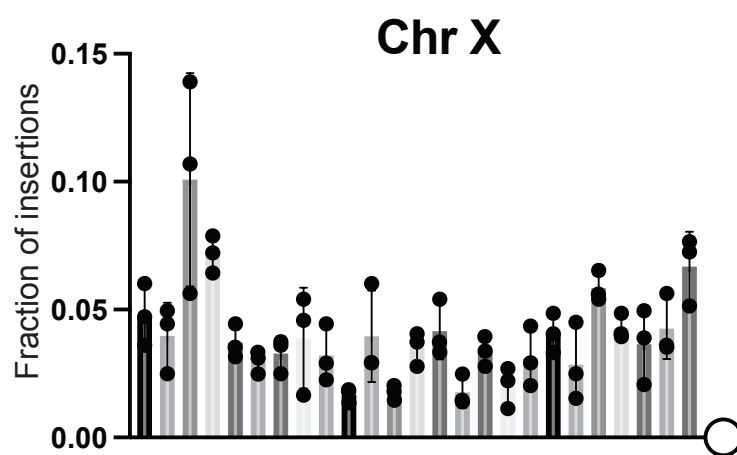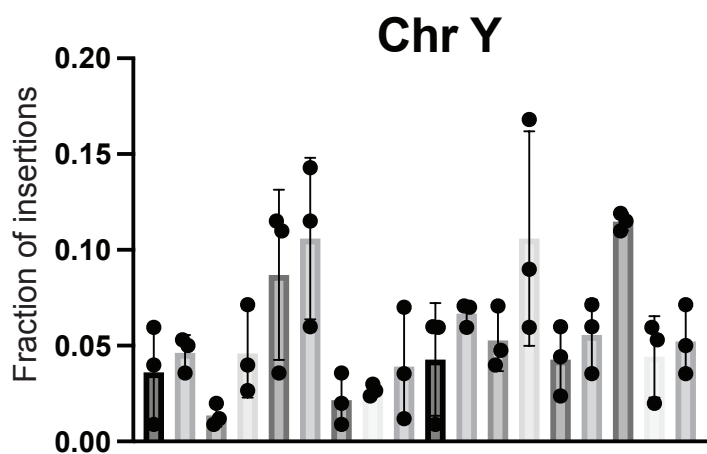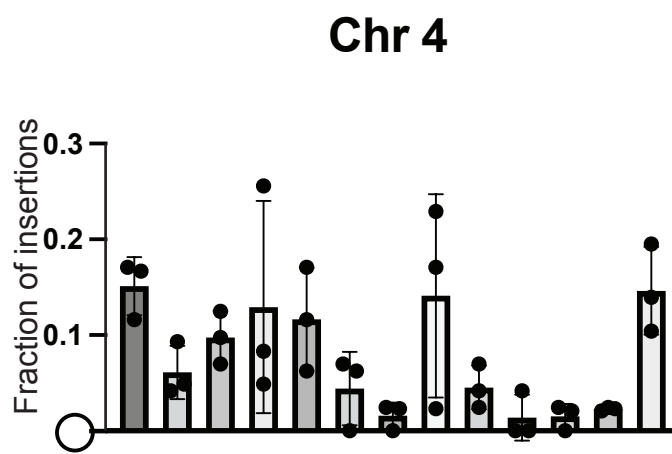

Supplement: supp [file elife_poa_e80169_Figure_3_figure_supplement_2.pdf › elife_poa_e80169_Figure_3_figure_supplement_2.pdf]

# Females

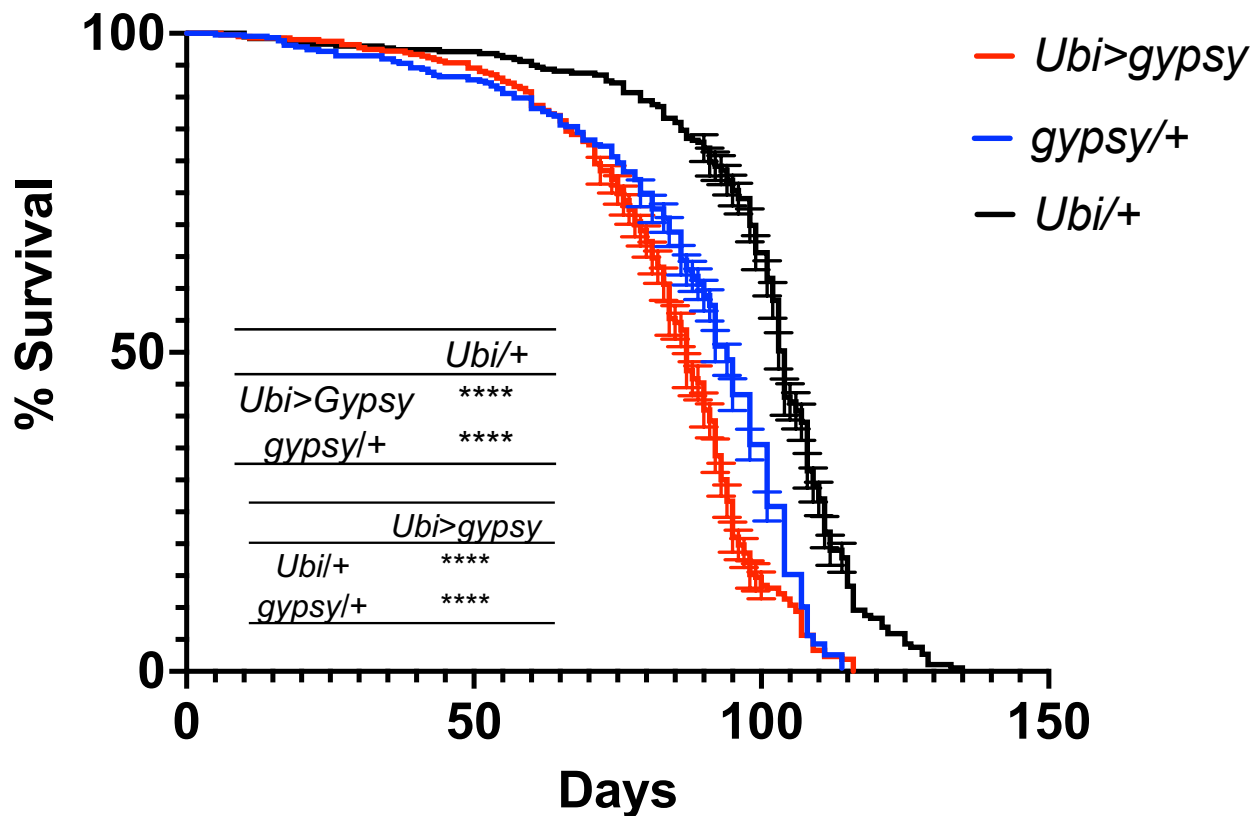

| Genotype            | Median survival | N   |
|---------------------|-----------------|-----|
| <i>Ubi&gt;gypsy</i> | 87 days         | 257 |
| <i>gypsy/+</i>      | 94 days         | 306 |
| <i>Ubi/+</i>        | 104 days        | 231 |

Supplement: supp [file elife_poa_e80169_Figure_4_figure_supplement_1.pdf › elife_poa_e80169_Figure_4_figure_supplement_1.pdf]

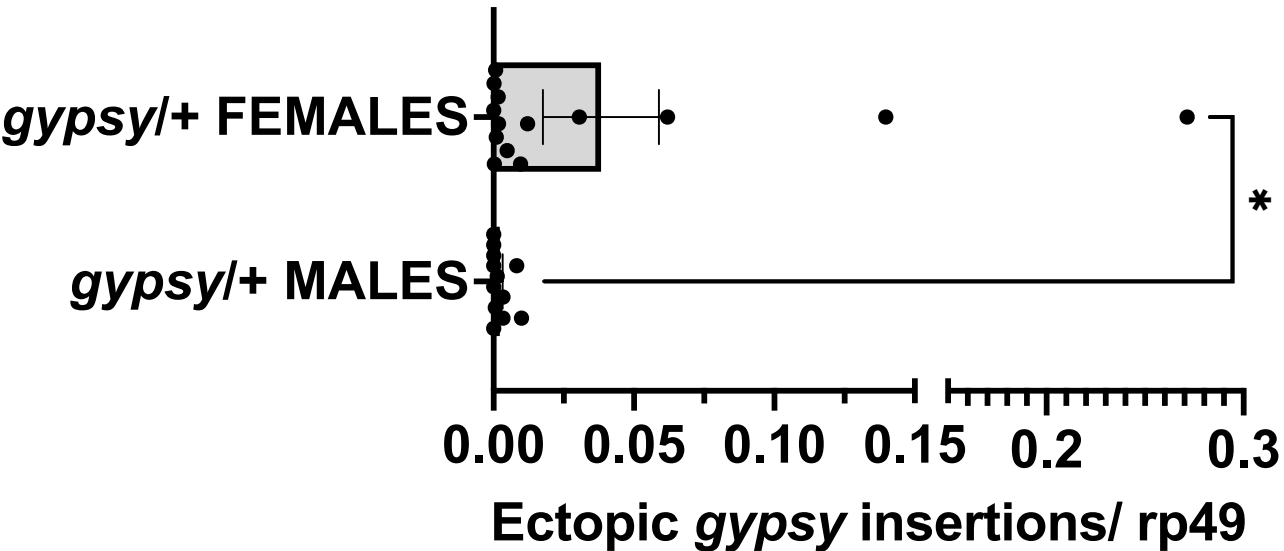

Supplement: supp [file elife_poa_e80169_Figure_4_figure_supplement_2.pdf › elife_poa_e80169_Figure_4_figure_supplement_2.pdf]

a)

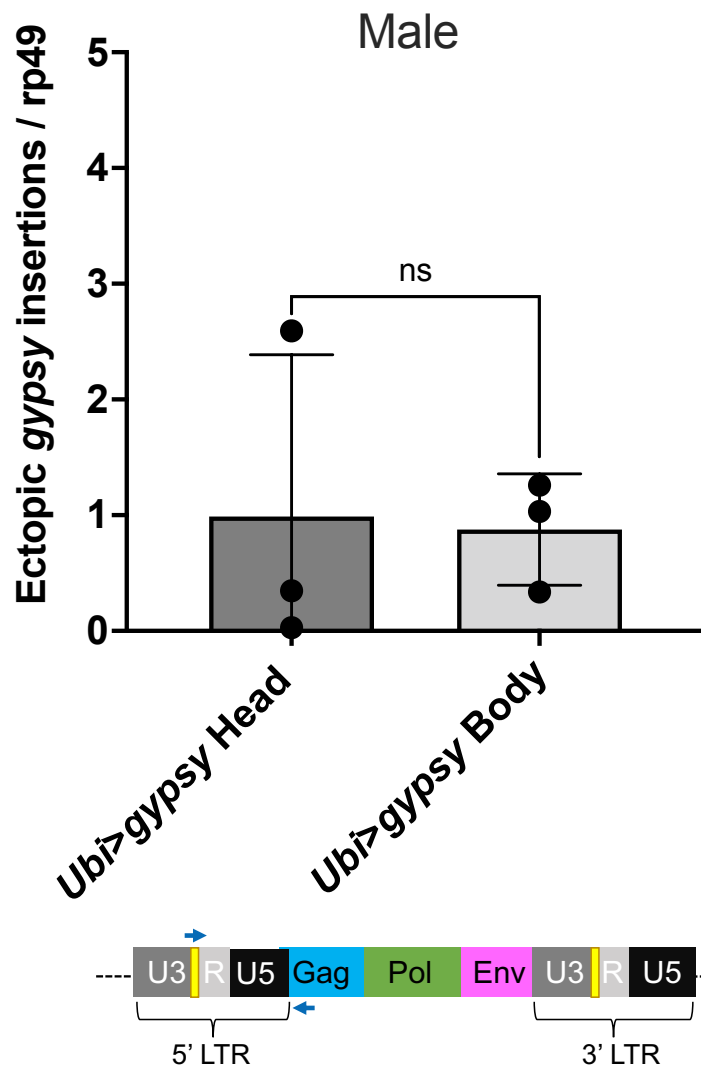

b)

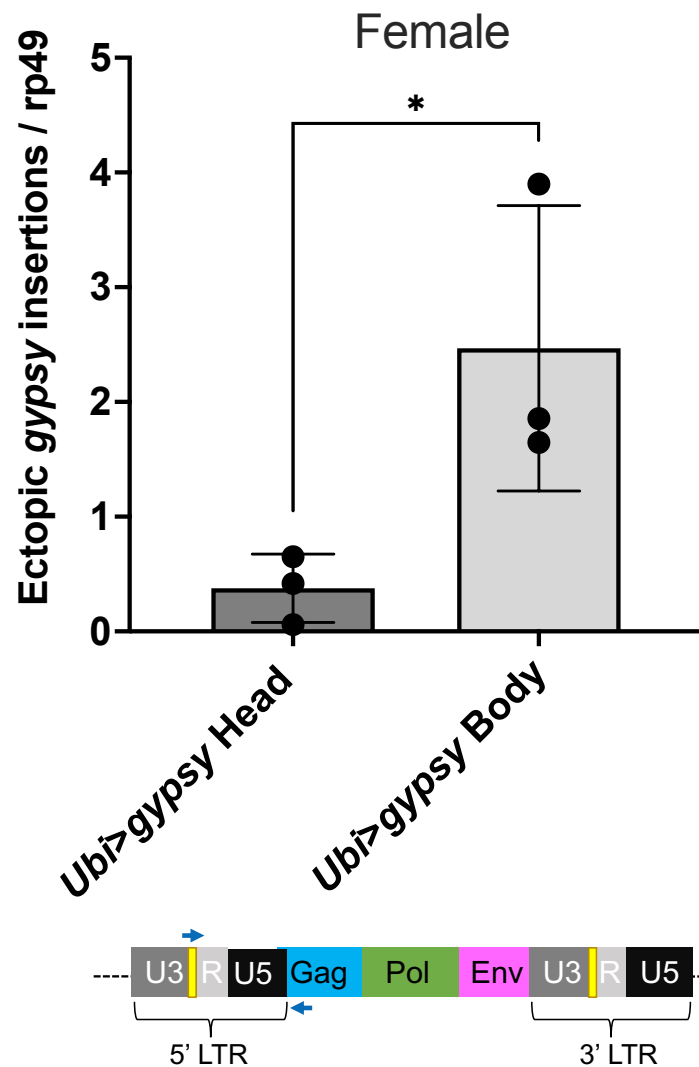

Supplement: supp [file elife_poa_e80169_Figure_4_figure_supplement_3.pdf › elife_poa_e80169_Figure_4_figure_supplement_3.pdf]

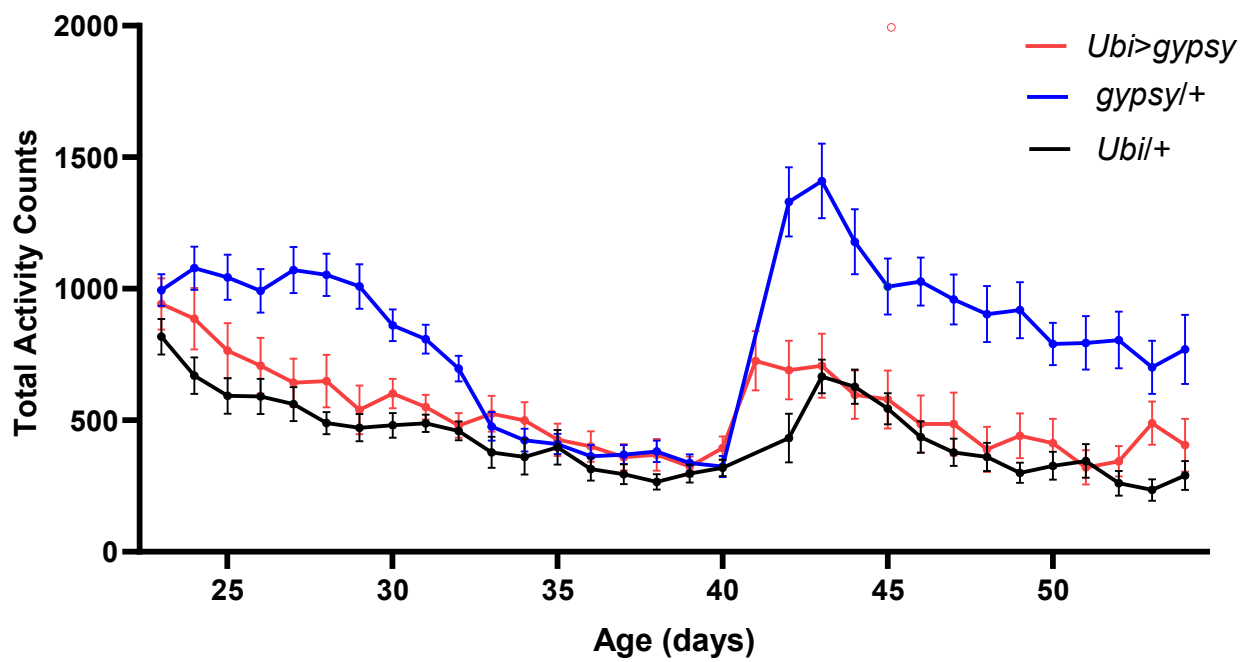

Supplement: supp [file elife_poa_e80169_Figure_7_figure_supplement_1.pdf › elife_poa_e80169_Figure_7_figure_supplement_1.pdf]

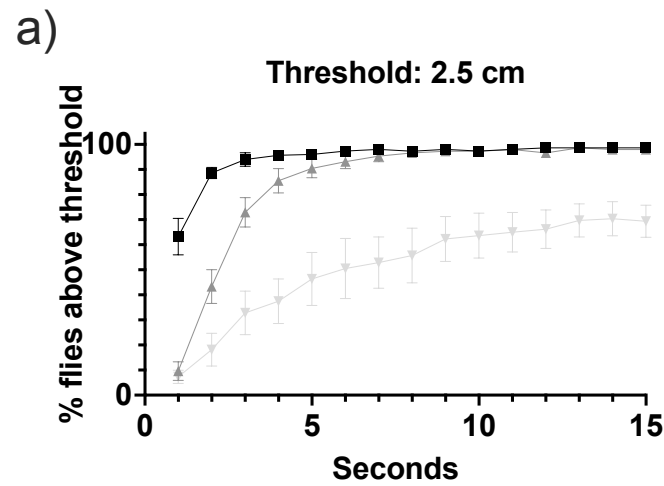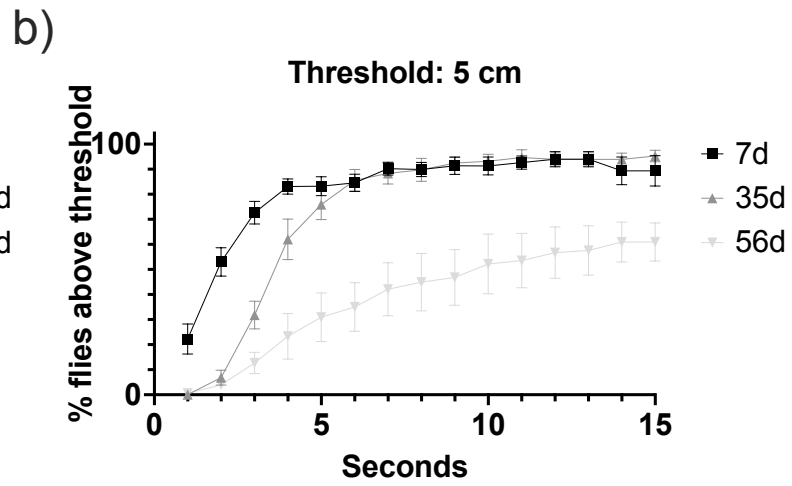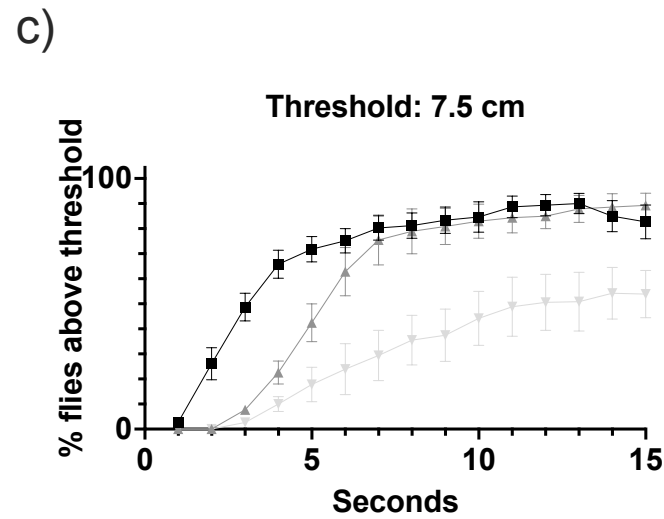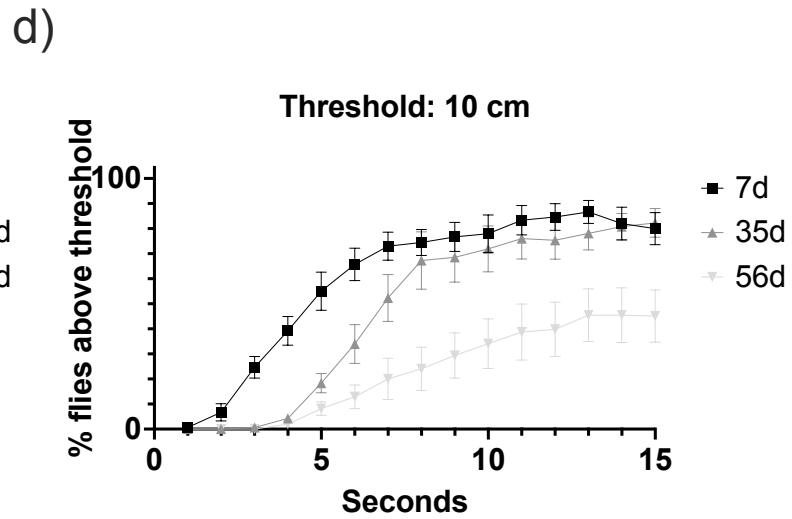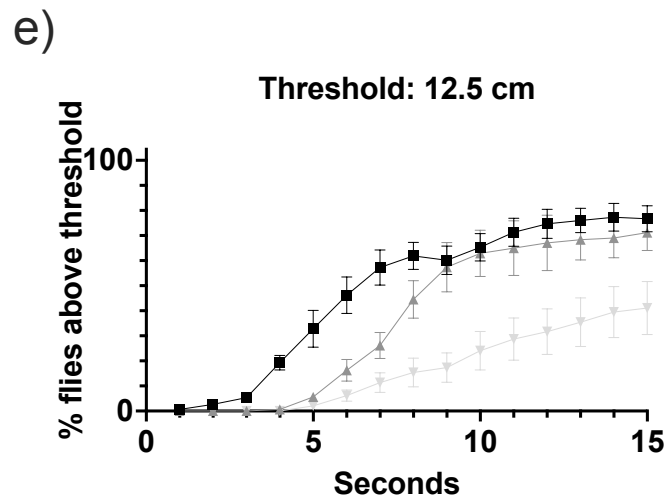

Supplement: supp [file elife_poa_e80169_Figure_7_figure_supplement_2.pdf › elife_poa_e80169_Figure_7_figure_supplement_2.pdf]

a)

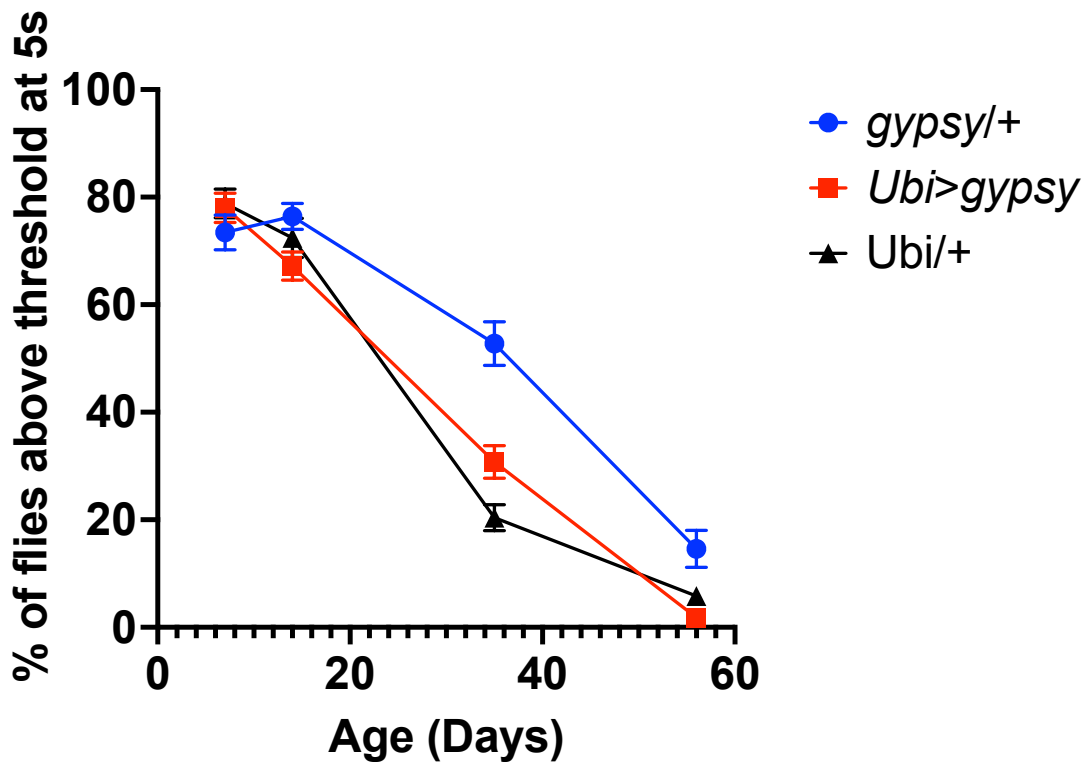

b)

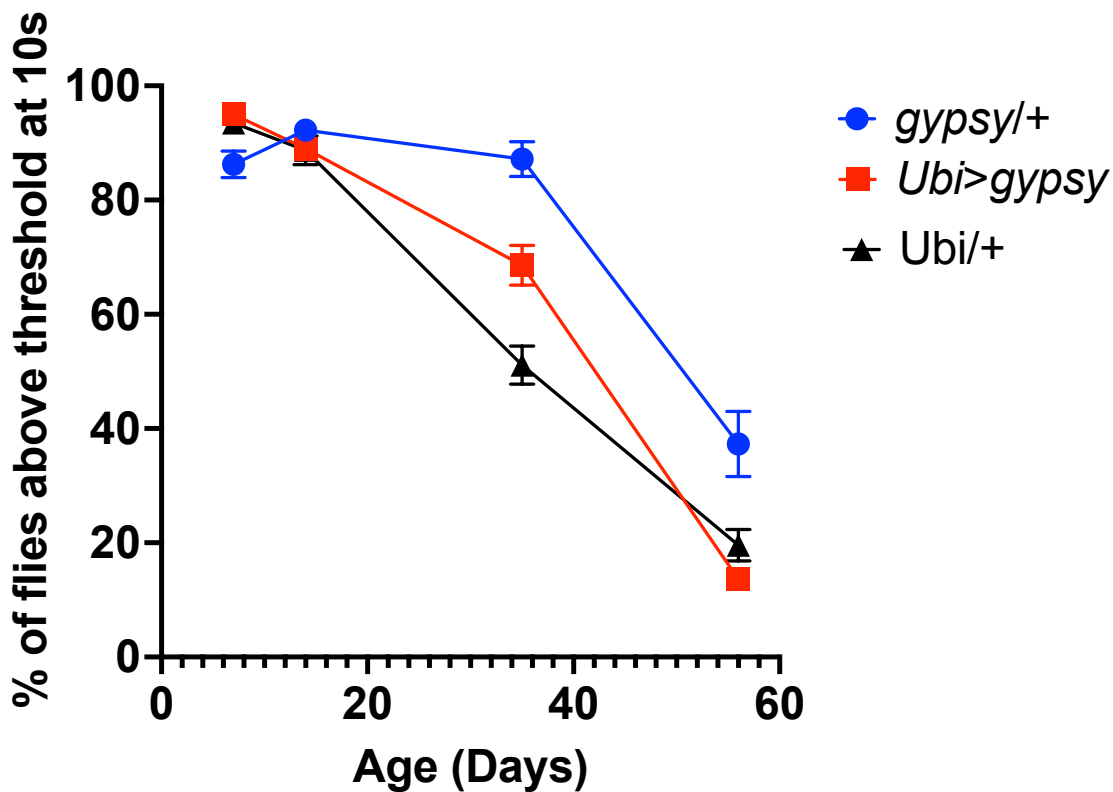

Supplement: supp [file elife_poa_e80169_Figure_7_figure_supplement_3.pdf › elife_poa_e80169_Figure_7_figure_supplement_3.pdf]
